# Supplementary material
Source: PubMed Central journal article supplement (PMC122956)

A

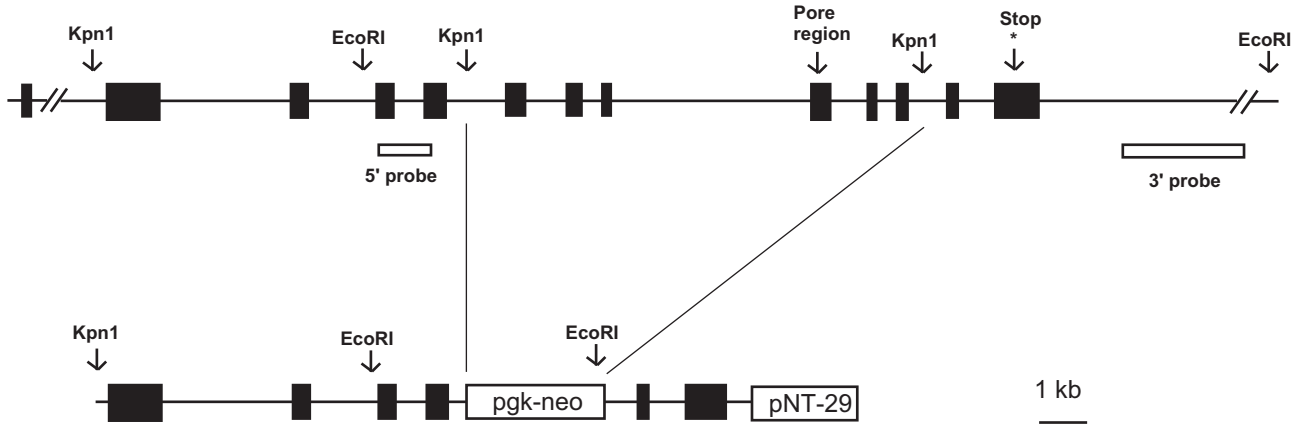

B

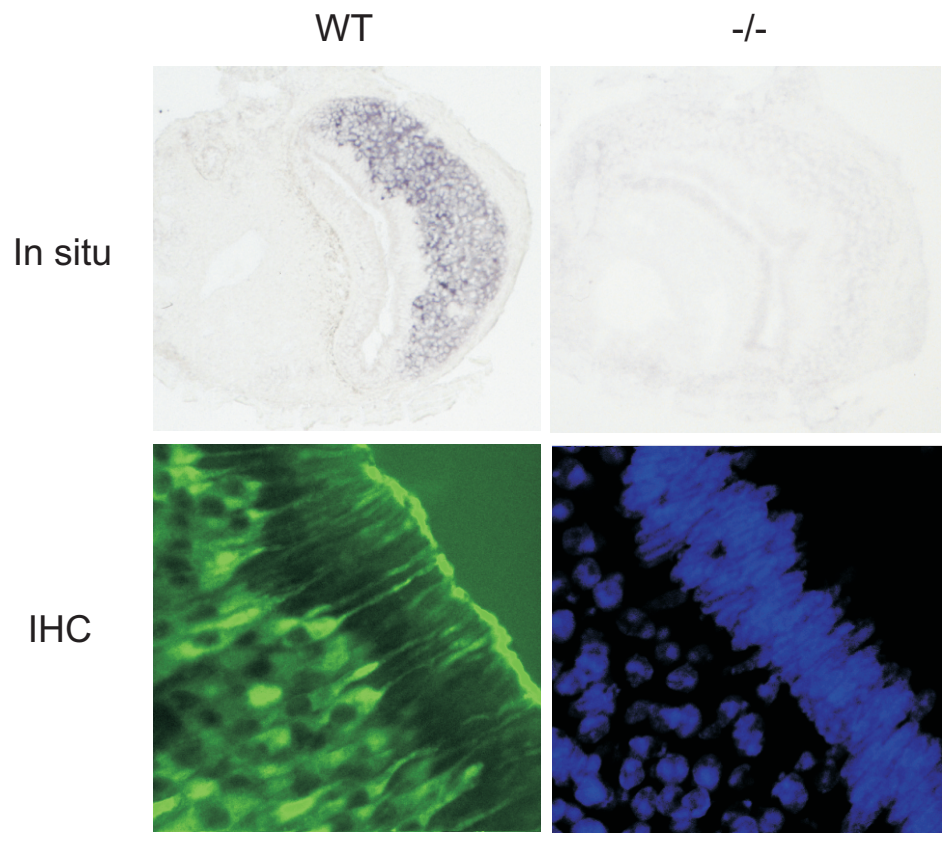

Supplement: pnas_082127599_3.pdf [file pnas_082127599_3.pdf]
